# Supplementary material for: Genomic and Phenotypic Characterization of Shiga Toxin-Producing Escherichia albertii Strains Isolated from Wild Birds in a Major Agricultural Region in California
Source: MDPI journal article supplement (doi:10.3390/microorganisms11112803), 2023-11-18
Supplement: s1 [file s1]

**Table S1.** Detection of *E. coli* T3SS effector genes in *E. albertii*.

| Gene              | Strain/pathotype                            | #Locus tag       | Clinical Strains |         |         |            |            |              |            |            |             | Chicken strain | Wild bird strains |        |        |         |         |         |         |         |         |         |
|-------------------|---------------------------------------------|------------------|------------------|---------|---------|------------|------------|--------------|------------|------------|-------------|----------------|-------------------|--------|--------|---------|---------|---------|---------|---------|---------|---------|
|                   |                                             |                  | 05-3106          | 07-3866 | 54-2045 | 2010C-3449 | 2011C-4180 | 2012EL-1823B | 2013C-4143 | 2014C-4015 | 2014EL-1348 | 2014C-4356     | RM9973            | RM9974 | RM9976 | RM10507 | RM10705 | RM15112 | RM15113 | RM15114 | RM15115 | RM15116 |
| <i>cif</i>        | <i>E. coli</i> O127:H6 str. E2348/69 (EPEC) | E2348C_RS03860   | 0                | 0       | 0       | 0          | 1          | 1            | 0          | 0          | 0           | 0              | 0                 | 0      | 0      | 0       | 0       | 0       | 0       | 0       | 0       | 0       |
| <i>espB</i>       | <i>E. coli</i> O157:H7 str. EDL933 (EHEC)   | Z5105            | 1                | 1       | 1*      | 1          | 1          | 1            | 1          | 1          | 1           | 1              | 1                 | 1      | 1      | 1       | 1       | 1       | 1       | 1       | 1       | 1       |
| <i>espC</i>       | <i>E. coli</i> O127:H6 str. E2348/69 (EPEC) | E2348C_RS15645   | 1*               | 1       | 1       | 1          | 1          | 1            | 1*         | 1          | 1           | 1              | 1                 | 1      | 1      | 1       | 1       | 1       | 1       | 1       | 1       | 1       |
| <i>espF</i>       | <i>E. coli</i> O157:H7 str. EDL933 (EHEC)   | Z5100            | 1                | 1       | 1       | 1          | 1          | 1*           | 1          | 1*         | 1*          | 1              | 1                 | 1      | 1      | 1       | 1*      | 1*      | 1*      | 1*      | 1*      | 1*      |
| <i>espG</i>       | <i>E. coli</i> O157:H7 str. EDL933 (EHEC)   | Z5142            | 1                | 1       | 1       | 1          | 1          | 1            | 1          | 1*         | 1           | 1              | 1                 | 1      | 1      | 1       | 1       | 1       | 1       | 1       | 1       | 1       |
| <i>espH</i>       | <i>E. coli</i> O157:H7 str. EDL933 (EHEC)   | Z5115            | 1                | 1       | 1       | 1          | 1          | 1            | 1          | 1          | 1           | 1              | 1                 | 1      | 1      | 1       | 1       | 1       | 1       | 1       | 1       | 1       |
| <i>espJ</i>       | <i>E. coli</i> O157:H7 str. EDL933 (EHEC)   | Z3071            | 1                | 1       | 1       | 1          | 2+1*       | 1            | 1          | 1          | 1           | 1              | 1                 | 1*     | 1      | 1*      | 1*      | 1       | 1       | 1       | 1*      | 1       |
| <i>espK</i>       | <i>E. coli</i> O157:H7 str. EDL933 (EHEC)   | Z1829            | 1*               | 1*      | 2       | 2          | 0          | 1+1*         | 1          | 1          | 1           | 1*             | 1                 | 1      | 1      | 1*      | 1       | 1       | 1       | 1       | 1       | 1       |
| <i>espL1</i>      | <i>E. coli</i> O157:H7 str. EDL933 (EHEC)   | Z2749            | 0                | 0       | 0       | 0          | 0          | 0            | 0          | 0          | 0           | 0              | 0                 | 0      | 0      | 0       | 0       | 0       | 1*      | 0       | 0       | 0       |
| <i>espL2</i>      | <i>E. coli</i> O157:H7 str. EDL933 (EHEC)   | Z4326            | 0                | 1*      | 0       | 1          | 0          | 0            | 0          | 1          | 1           | 0              | 0                 | 0      | 0      | 0       | 1       | 1       | 1*      | 1*      | 1*      | 1*      |
| <i>espL4</i>      | <i>E. coli</i> O157:H7 str. EDL933 (EHEC)   | Z5608            | 0                | 0       | 0       | 0          | 0          | 0            | 0          | 0          | 0           | 0              | 0                 | 0      | 0      | 0       | 0       | 0       | 0       | 0       | 0       | 0       |
| <i>espM1</i>      | <i>E. coli</i> O157:H7 str. EDL933 (EHEC)   | Z2565            | 0                | 0       | 0       | 0          | 0          | 0            | 0          | 0          | 0           | 0              | 1                 | 0      | 0      | 0       | 0       | 0       | 0       | 0       | 0       | 0       |
| <i>espM2</i>      | <i>E. coli</i> O157:H7 str. EDL933 (EHEC)   | Z3918            | 1*               | 1       | 1       | 1*         | 2          | 3            | 1*         | 2          | 2           | 1              | 0                 | 1      | 2      | 3       | 3       | 2       | 2       | 2       | 2       | 2       |
| <i>espN</i>       | <i>E. coli</i> O157:H7 str. Sakai (EHEC)    | ECs_1561         | 0                | 0       | 0       | 1          | 0          | 0            | 0          | 0          | 0           | 0              | 0                 | 0      | 0      | 0       | 0       | 0       | 0       | 0       | 0       | 0       |
| <i>espO1-1</i>    | <i>E. coli</i> O157:H7 str. Sakai (EHEC)    | ECs_1567         | 1                | 0       | 1       | 1          | 0          | 1            | 2          | 1          | 2           | 0              | 1                 | 1      | 1      | 1       | 0       | 2       | 2       | 2       | 2       | 2       |
| <i>espO1-2</i>    | <i>E. coli</i> O157:H7 str. Sakai (EHEC)    | ECs_1821         | 0                | 1       | 0       | 1          | 0          | 1            | 0          | 1          | 1           | 0              | 1                 | 1      | 1      | 1       | 0       | 1       | 1       | 1       | 1       | 1       |
| <i>espR1</i>      | <i>E. coli</i> O157:H7 str. Sakai (EHEC)    | ECs_2073         | 0                | 0       | 0       | 0          | 0          | 0            | 0          | 0          | 0           | 0              | 0                 | 0      | 0      | 0       | 0       | 0       | 0       | 0       | 0       | 0       |
| <i>espR3</i>      | <i>E. coli</i> O157:H7 str. EDL933 (EHEC)   | Z3023            | 0                | 0       | 0       | 0          | 0          | 0            | 0          | 0          | 0           | 0              | 0                 | 0      | 0      | 0       | 0       | 0       | 0       | 0       | 0       | 0       |
| <i>espR4</i>      | <i>E. coli</i> O157:H7 str. EDL933 (EHEC)   | Z3026            | 0                | 0       | 0       | 0          | 0          | 0            | 0          | 0          | 0           | 0              | 0                 | 0      | 0      | 0       | 0       | 0       | 0       | 0       | 0       | 0       |
| <i>espW</i>       | <i>E. coli</i> O157:H7 str. EDL933 (EHEC)   | Z3920            | 1*               | 1       | 1       | 1          | 0          | 1            | 0          | 1          | 1           | 1              | 1*                | 1      | 1      | 1       | 0       | 1       | 1       | 1       | 1       | 1       |
| <i>espX1</i>      | <i>E. coli</i> O157:H7 str. EDL933 (EHEC)   | Z0025            | 0                | 0       | 1*      | 0          | 1*         | 1*           | 1*         | 1*         | 1*          | 0              | 0                 | 1      | 0      | 0       | 1*      | 1*      | 1       | 0       | 1*      | 1*      |
| <i>espX2</i>      | <i>E. coli</i> O157:H7 str. EDL933 (EHEC)   | Z1019            | 0                | 0       | 0       | 0          | 0          | 0            | 0          | 0          | 0           | 0              | 0                 | 0      | 0      | 0       | 0       | 0       | 0       | 0       | 0       | 0       |
| <i>espX4</i>      | <i>E. coli</i> O157:H7 str. EC4115 (EHEC)   | ECH74115_RS27410 | 0                | 0       | 0       | 0          | 0          | 0            | 0          | 0          | 0           | 0              | 0                 | 0      | 0      | 0       | 0       | 0       | 0       | 0       | 0       | 0       |
| <i>espX5</i>      | <i>E. coli</i> O157:H7 str. EDL933 (EHEC)   | Z5665            | 0                | 0       | 0       | 0          | 0          | 0            | 0          | 0          | 0           | 0              | 0                 | 0      | 0      | 0       | 0       | 0       | 0       | 0       | 0       | 0       |
| <i>espX6</i>      | <i>E. coli</i> O157:H7 str. EDL933 (EHEC)   | Z5935            | 0                | 1       | 1       | 1          | 1          | 1            | 1          | 1          | 1           | 1              | 1                 | 1      | 1      | 1       | 1       | 1       | 1       | 1       | 1       | 1       |
| <i>espX7/nleL</i> | <i>E. coli</i> O157:H7 str. EDL933 (EHEC)   | Z1822            | 0                | 1       | 0       | 1          | 0          | 1            | 0          | 1          | 1           | 1              | 0                 | 0      | 1      | 1       | 1       | 1       | 1       | 1       | 1       | 1       |
| <i>espY1</i>      | <i>E. coli</i> O157:H7 str. EDL933 (EHEC)   | Z0065            | 0                | 0       | 0       | 0          | 0          | 0            | 0          | 0          | 0           | 0              | 0                 | 0      | 0      | 0       | 0       | 0       | 0       | 0       | 0       | 0       |
| <i>espY2</i>      | <i>E. coli</i> O157:H7 str. EDL933 (EHEC)   | Z0078            | 0                | 0       | 0       | 0          | 0          | 0            | 0          | 0          | 0           | 0              | 0                 | 0      | 0      | 0       | 0       | 0       | 0       | 0       | 0       | 0       |
| <i>espY3</i>      | <i>E. coli</i> O157:H7 str. EDL933 (EHEC)   | Z0521            | 1                | 1       | 0       | 1          | 1          | 1            | 1          | 1          | 0           | 1              | 1                 | 1      | 1      | 1       | 1       | 1       | 1       | 1       | 1       | 1       |
| <i>espY4</i>      | <i>E. coli</i> O157:H7 str. EDL933 (EHEC)   | Z5211            | 0                | 0       | 0       | 0          | 0          | 1            | 0          | 0          | 0           | 0              | 0                 | 1      | 0      | 0       | 1*      | 1*      | 1*      | 0       | 0       | 0       |
| <i>espY5</i>      | <i>E. coli</i> O157:H7 str. EDL933 (EHEC)   | Z5214            | 0                | 0       | 0       | 0          | 0          | 1            | 0          | 1          | 3*          | 0              | 0                 | 0      | 0      | 1*      | 1*      | 1       | 1*      | 1*      | 1*      | 1       |
| <i>espZ</i>       | <i>E. coli</i> O157:H7 str. EDL933 (EHEC)   | Z5122            | 1                | 1       | 1       | 1          | 1          | 1            | 1          | 1          | 1           | 1              | 1                 | 1      | 1      | 1       | 1       | 1       | 1       | 1       | 1       | 1       |
| <i>map</i>        | <i>E. coli</i> O157:H7 str. EDL933 (EHEC)   | Z5113            | 1                | 1       | 1       | 1          | 1          | 1            | 1          | 1          | 1           | 1              | 1                 | 1      | 1      | 1       | 1       | 1       | 1       | 1       | 1       | 1       |
| <i>nleA</i>       | <i>E. coli</i> O157:H7 str. EDL933 (EHEC)   | Z6024            | 1*               | 1       | 0       | 1          | 1*         | 1            | 0          | 1          | 1           | 1              | 1                 | 1      | 1      | 1       | 1*      | 1       | 1       | 1       | 1       | 1       |
| <i>nleB1</i>      | <i>E. coli</i> O157:H7 str. EDL933 (EHEC)   | Z4328            | 0                | 1       | 0       | 2          | 0          | 1            | 0          | 1          | 1           | 1              | 1                 | 1      | 0      | 1*      | 1       | 1       | 1       | 1       | 1       | 1*      |
| <i>nleB2</i>      | <i>E. coli</i> O157:H7 str. EDL933 (EHEC)   | Z0985            | 0                | 0       | 1       | 0          | 1          | 0            | 0          | 0          | 0           | 0              | 0                 | 0      | 0      | 0       | 0       | 0       | 0       | 0       | 0       | 0       |
| <i>nleB2-2</i>    | <i>E. coli</i> O55:H7 str. CB9615 (EPEC)    | G2583_RS01765    | 1                | 0       | 0       | 0          | 0          | 0            | 1          | 0          | 0           | 0              | 0                 | 0      | 0      | 0       | 0       | 0       | 0       | 0       | 0       | 0       |

|                     |                                                |                    |    |   |    |      |    |      |      |      |      |      |   |      |      |   |      |      |      |      |      |      |
|---------------------|------------------------------------------------|--------------------|----|---|----|------|----|------|------|------|------|------|---|------|------|---|------|------|------|------|------|------|
| <i>nleC</i>         | <i>E. coli</i> O157:H7<br>str. EDL933 (EHEC)   | Z0986              | 0  | 1 | 0  | 0    | 1* | 1    | 0    | 1    | 1    | 1+1* | 0 | 1    | 1    | 1 | 1    | 1    | 1    | 1    | 1    | 1    |
| <i>nleD</i>         | <i>E. coli</i> O157:H7<br>str. EDL933 (EHEC)   | Z0990              | 0  | 0 | 0  | 0    | 1  | 1    | 0    | 1    | 1    | 0    | 0 | 0    | 1    | 0 | 0    | 1*   | 1*   | 1*   | 1*   | 1*   |
| <i>nleE</i>         | <i>E. coli</i> O157:H7<br>str. EDL933 (EHEC)   | Z4329              | 0  | 1 | 0  | 1    | 0  | 1    | 0    | 1    | 1    | 1    | 1 | 1    | 0    | 1 | 1    | 1    | 1*   | 1    | 1    | 1    |
| <i>nleE-2</i>       | <i>E. coli</i> O127:H6<br>str. E2348/69 (EPEC) | E2348C_<br>RS05730 | 0  | 0 | 0  | 1    | 0  | 0    | 0    | 0    | 0    | 0    | 0 | 0    | 0    | 0 | 0    | 0    | 0    | 0    | 0    | 0    |
| <i>nleF</i>         | <i>E. coli</i> O157:H7<br>str. EDL933 (EHEC)   | Z6020              | 1  | 1 | 1  | 1    | 1  | 1    | 1    | 1    | 1    | 1    | 1 | 1    | 1    | 1 | 1    | 1    | 1    | 1    | 1    | 1    |
| <i>nleG2-2</i>      | <i>E. coli</i> O157:H7<br>str. EDL933 (EHEC)   | Z2339              | 0  | 1 | 0  | 1    | 2* | 1    | 0    | 1    | 1    | 0    | 1 | 2    | 1    | 2 | 1    | 1    | 1    | 1    | 1    | 1    |
| <i>nleG2-4</i>      | <i>E. coli</i> O55:H7<br>str. CB9615 (EPEC)    | G2583_<br>RS09785  | 1  | 0 | 0  | 1    | 0  | 0    | 0    | 0    | 0    | 1    | 0 | 0    | 0    | 0 | 0    | 0    | 0    | 0    | 0    | 0    |
| <i>nleG5-1</i>      | <i>E. coli</i> O157:H7<br>str. EDL933 (EHEC)   | Z2337              | 1* | 3 | 1  | 1+1* | 0  | 3+1* | 1    | 2    | 2+1* | 3    | 2 | 4+1* | 3+1* | 4 | 1+1* | 2+1* | 2+1* | 2+1* | 2+1* | 2+1* |
| <i>nleG6-1</i>      | <i>E. coli</i> O157:H7<br>str. EDL933 (EHEC)   | Z2338              | 0  | 3 | 0  | 1    | 2  | 3    | 0    | 1+1* | 1    | 4    | 3 | 4    | 1    | 3 | 2    | 1+2* | 1+1* | 1+1* | 1+1* | 1+1* |
| <i>nleG6-3</i>      | <i>E. coli</i> O157:H7<br>str. EDL933 (EHEC)   | Z3921              | 0  | 0 | 1  | 1    | 0  | 0    | 0    | 0    | 1*   | 0    | 0 | 0    | 1    | 0 | 0    | 0    | 0    | 0    | 0    | 0    |
| <i>nleG7</i>        | <i>E. coli</i> O157:H7<br>str. EDL933 (EHEC)   | Z2077              | 0  | 0 | 1  | 1    | 0  | 1    | 1    | 0    | 0    | 0    | 0 | 0    | 1    | 0 | 0    | 0    | 0    | 0    | 0    | 0    |
| <i>nleG8-2</i>      | <i>E. coli</i> O157:H7<br>str. EDL933 (EHEC)   | Z3919              | 0  | 0 | 1  | 1    | 0  | 0    | 0    | 0    | 0    | 0    | 0 | 0    | 0    | 0 | 0    | 0    | 0    | 0    | 0    | 0    |
| <i>nleG-1</i>       | <i>E. coli</i> O55:H7<br>str. CB9615 (EPEC)    | G2583_<br>RS01745  | 2  | 2 | 2  | 0    | 1  | 3    | 2+1* | 3    | 3    | 2    | 1 | 2    | 2    | 4 | 4    | 3    | 3    | 3    | 3    | 3    |
| <i>nleG-2</i>       | <i>E. coli</i> O55:H7<br>str. CB9615 (EPEC)    | G2583_<br>RS01740  | 0  | 0 | 0  | 0    | 0  | 1    | 0    | 1    | 1    | 0    | 1 | 2    | 1    | 1 | 1    | 0    | 1    | 1    | 1    | 1    |
| <i>nleH1</i>        | <i>E. coli</i> O157:H7<br>str. EDL933 (EHEC)   | Z0989              | 1  | 1 | 1* | 1*   | 2  | 3    | 2*   | 2+1* | 2    | 0    | 1 | 2    | 2    | 1 | 2    | 1+2* | 2    | 2+1* | 1+2* | 2    |
| <i>nleH2</i>        | <i>E. coli</i> O157:H7<br>str. EDL933 (EHEC)   | Z6021              | 0  | 0 | 1* | 0    | 0  | 0    | 1*   | 0    | 0    | 0    | 0 | 0    | 0    | 0 | 0    | 0    | 0    | 0    | 0    | 0    |
| <i>tccP/espF(U)</i> | <i>E. coli</i> O103:H2<br>str. 12009 (EHEC)    | ECO103_<br>RS12465 | 1  | 1 | 1  | 1*   | 1  | 1    | 1    | 1*   | 1    | 1    | 0 | 1    | 0    | 1 | 1    | 0    | 1    | 1*   | 1*   | 1    |
| <i>tir</i>          | <i>E. coli</i> O157:H7<br>str. EDL933 (EHEC)   | Z5112              | 1  | 1 | 1  | 1    | 1  | 1    | 1    | 1    | 1    | 1    | 1 | 1    | 1    | 1 | 1*   | 1*   | 1    | 1    | 1*   | 1    |

\*: pseudo gene; presence of mutations

0: Not detected

Numbers equal to or great than 1: the number of the homologs

Table S2. Detection of toxin-related genes in *E. albertii*.

| <i>Gene</i> | Function                                                         | Clinical Strains |         |         |            |            |              |            |            |             | Chick strain | Wild bird strains |        |        |         |         |         |         |         |         |         |
|-------------|------------------------------------------------------------------|------------------|---------|---------|------------|------------|--------------|------------|------------|-------------|--------------|-------------------|--------|--------|---------|---------|---------|---------|---------|---------|---------|
|             |                                                                  | 05-3106          | 07-3866 | 54-2045 | 2010C-3449 | 2011C-4180 | 2012EL-1823B | 2013C-4143 | 2014C-4015 | 2014EL-1348 | 2014C-4356   | RM9973            | RM9974 | RM9976 | RM10507 | RM10705 | RM15112 | RM15113 | RM15114 | RM15115 | RM15116 |
| <i>eatA</i> | Serine protease autotransporter toxin EatA                       | 0                | 0       | 0       | 0          | 0          | 0            | 0          | 0          | 0           | 0            | 0                 | 0      | 0      | 0       | 0       | 0       | 0       | 0       | 0       | 0       |
| <i>espC</i> | Serine protease autotransporter toxin EspC                       | 1                | 0       | 1*      | 0          | 0          | 0            | 0          | 0          | 0           | 0            | 0                 | 0      | 0      | 0       | 0       | 0       | 0       | 0       | 0       | 0       |
| <i>espI</i> | Serine protease autotransporter EspI                             | 0                | 0       | 1       | 1          | 1*         | 0            | 1*         | 0          | 0           | 0            | 0                 | 0      | 0      | 0       | 0       | 0       | 0       | 0       | 0       | 0       |
| <i>espP</i> | Serine protease autotransporter EspP                             | 0                | 0       | 0       | 0          | 0          | 0            | 0          | 0          | 0           | 0            | 0                 | 0      | 0      | 0       | 0       | 0       | 0       | 0       | 0       | 0       |
| <i>pet</i>  | Serine protease autotransporter toxin Pet                        | 0                | 0       | 0       | 0          | 0          | 0            | 0          | 0          | 0           | 0            | 0                 | 0      | 0      | 0       | 0       | 0       | 0       | 0       | 0       | 0       |
| <i>pic</i>  | Serine protease autotransporter toxin Pic                        | 0                | 0       | 0       | 0          | 0          | 0            | 0          | 0          | 0           | 0            | 0                 | 0      | 0      | 0       | 0       | 0       | 0       | 0       | 0       | 0       |
| <i>sat</i>  | Serine protease autotransporter toxin Sat                        | 0                | 0       | 0       | 0          | 0          | 0            | 0          | 0          | 0           | 0            | 0                 | 0      | 0      | 0       | 0       | 0       | 0       | 0       | 0       | 0       |
| <i>sigA</i> | Serine protease autotransporter toxin SigA                       | 0                | 0       | 0       | 0          | 0          | 0            | 1*         | 0          | 0           | 0            | 0                 | 0      | 0      | 0       | 0       | 0       | 0       | 0       | 0       | 0       |
| <i>tsh</i>  | Temperature-sensitive protease autotransporter hemagglutinin Tsh | 1                | 0       | 0       | 0          | 0          | 0            | 0          | 0          | 0           | 0            | 0                 | 0      | 0      | 0       | 0       | 0       | 0       | 0       | 0       | 0       |
| <i>vat</i>  | Vacuolating autotransporter toxin Vat                            | 0                | 1       | 0       | 1          | 0          | 2            | 0          | 2          | 2           | 2            | 1                 | 1      | 1      | 1 + 1*  | 1 + 1*  | 2       | 1 + 1*  | 2       | 1 + 1*  | 1 + 1*  |
| <i>cdiA</i> | Contact-dependent inhibition effector tRNA nuclease              | 0                | 1       | 0       | 1*         | 0          | 0            | 0          | 0          | 0           | 1            | 1                 | 0      | 1*     | 1       | 0       | 0       | 0       | 0       | 0       | 0       |
| <i>cdiB</i> | ShIB/FhaC/HecB family hemolysin secretion/activation protein     | 0                | 1       | 0       | 1          | 0          | 0            | 0          | 0          | 0           | 1            | 1                 | 0      | 1      | 1       | 0       | 0       | 0       | 0       | 0       | 0       |
| <i>cdtA</i> | Cytotolethal distending toxin type IV subunit CdtA               | 1                | 1       | 1       | 1          | 2          | 3            | 1          | 2          | 2           | 1            | 2                 | 2      | 2      | 2       | 2       | 2       | 2       | 2       | 2       | 2       |
| <i>cdtB</i> | Cytotolethal distending toxin type IV nuclease subunit CdtB      | 1                | 1       | 1*      | 1          | 1+1*       | 2+1*         | 1          | 2          | 2           | 1            | 2                 | 2      | 2      | 2       | 2       | 2       | 2       | 2       | 2       | 2       |
| <i>cdtC</i> | Cytotolethal distending toxin type IV subunit CdtC               | 1                | 1       | 0       | 1          | 2          | 3            | 1          | 2          | 2           | 1            | 2                 | 2      | 2      | 2       | 2       | 2       | 2       | 1+1*    | 2       | 2       |
| <i>cnf1</i> | Cytotoxic necrotizing factor CNF1                                | 0                | 0       | 0       | 0          | 0          | 0            | 0          | 0          | 0           | 0            | 0                 | 0      | 0      | 0       | 0       | 0       | 0       | 0       | 0       | 0       |
| <i>eltA</i> | Heat-labile enterotoxin LT subunit A                             | 0                | 0       | 0       | 0          | 0          | 0            | 0          | 0          | 0           | 0            | 0                 | 0      | 0      | 0       | 0       | 0       | 0       | 0       | 0       | 0       |
| <i>eltB</i> | Heat-labile enterotoxin LT subunit B                             | 0                | 0       | 0       | 0          | 0          | 0            | 0          | 0          | 0           | 0            | 0                 | 0      | 0      | 0       | 0       | 0       | 0       | 0       | 0       | 0       |
| <i>stx1</i> | Heat-stable enterotoxin ST-I group a                             | 0                | 0       | 0       | 0          | 0          | 0            | 0          | 0          | 0           | 0            | 0                 | 0      | 0      | 0       | 0       | 0       | 0       | 0       | 0       | 0       |
| <i>hlyA</i> | Enterohemolysin EhxA                                             | 0                | 0       | 0       | 0          | 0          | 0            | 0          | 0          | 0           | 0            | 0                 | 0      | 0      | 0       | 0       | 0       | 0       | 0       | 0       | 0       |
| <i>hlyB</i> | Enterohemolysin T1SS ABC transporter permease/ATPase EhxB        | 0                | 0       | 0       | 0          | 0          | 0            | 0          | 0          | 0           | 0            | 0                 | 0      | 0      | 0       | 0       | 0       | 0       | 0       | 0       | 0       |
| <i>hlyC</i> | Enterohemolysin-activating lysine-acyltransferase EhxC           | 0                | 0       | 0       | 0          | 0          | 0            | 0          | 0          | 0           | 0            | 0                 | 0      | 0      | 0       | 0       | 0       | 0       | 0       | 0       | 0       |
| <i>hlyD</i> | Enterohemolysin T1SS ABC transporter subunit EhxD                | 0                | 0       | 0       | 0          | 0          | 0            | 0          | 0          | 0           | 0            | 0                 | 0      | 0      | 0       | 0       | 0       | 0       | 0       | 0       | 0       |
| <i>hlyE</i> | Hemolysin HlyE                                                   | 0                | 0       | 0       | 0          | 0          | 0            | 0          | 0          | 0           | 0            | 0                 | 0      | 0      | 0       | 0       | 0       | 0       | 0       | 0       | 0       |
| <i>efal</i> | lymphostatin Efa1/LifA                                           | 0                | 0       | 0       | 1          | 0          | 1*           | 0          | 1*         | 1*          | 0            | 0                 | 0      | 0      | 0       | 0       | 0       | 0       | 0       | 0       | 0       |
| <i>senB</i> | Enterotoxin production-related protein TieB                      | 0                | 0       | 0       | 0          | 0          | 0            | 0          | 0          | 0           | 0            | 0                 | 0      | 0      | 0       | 0       | 0       | 0       | 0       | 0       | 0       |
| <i>toxB</i> | Toxin B                                                          | 1                | 1*      | 0       | 0          | 1*         | 1            | 0          | 1          | 1           | 1            | 1                 | 1      | 1      | 1       | 1       | 1       | 1       | 1       | 1       | 1*      |
| <i>stx1</i> | Shiga toxin 1                                                    | 0                | 0       | 0       | 0          | 0          | 0            | 0          | 0          | 0           | 0            | 0                 | 0      | 0      | 0       | 0       | 0       | 0       | 0       | 0       | 0       |
| <i>stx2</i> | Shiga toxin 2                                                    | 0                | 0       | 0       | 0          | 1          | 1            | 0          | 1          | 1           | 0            | 1                 | 1      | 1      | 1       | 1       | 1       | 1       | 1       | 1       | 1       |
| <i>eae</i>  | Intimin                                                          | 1                | 1       | 1       | 1          | 1          | 1            | 1          | 1          | 1           | 1            | 1                 | 1      | 1      | 1       | 1       | 1       | 1       | 1       | 1       | 1       |

\*: pseudo gene; presence of mutations

0: Not detected

Numbers equal to or great than 1: the number of the homologs

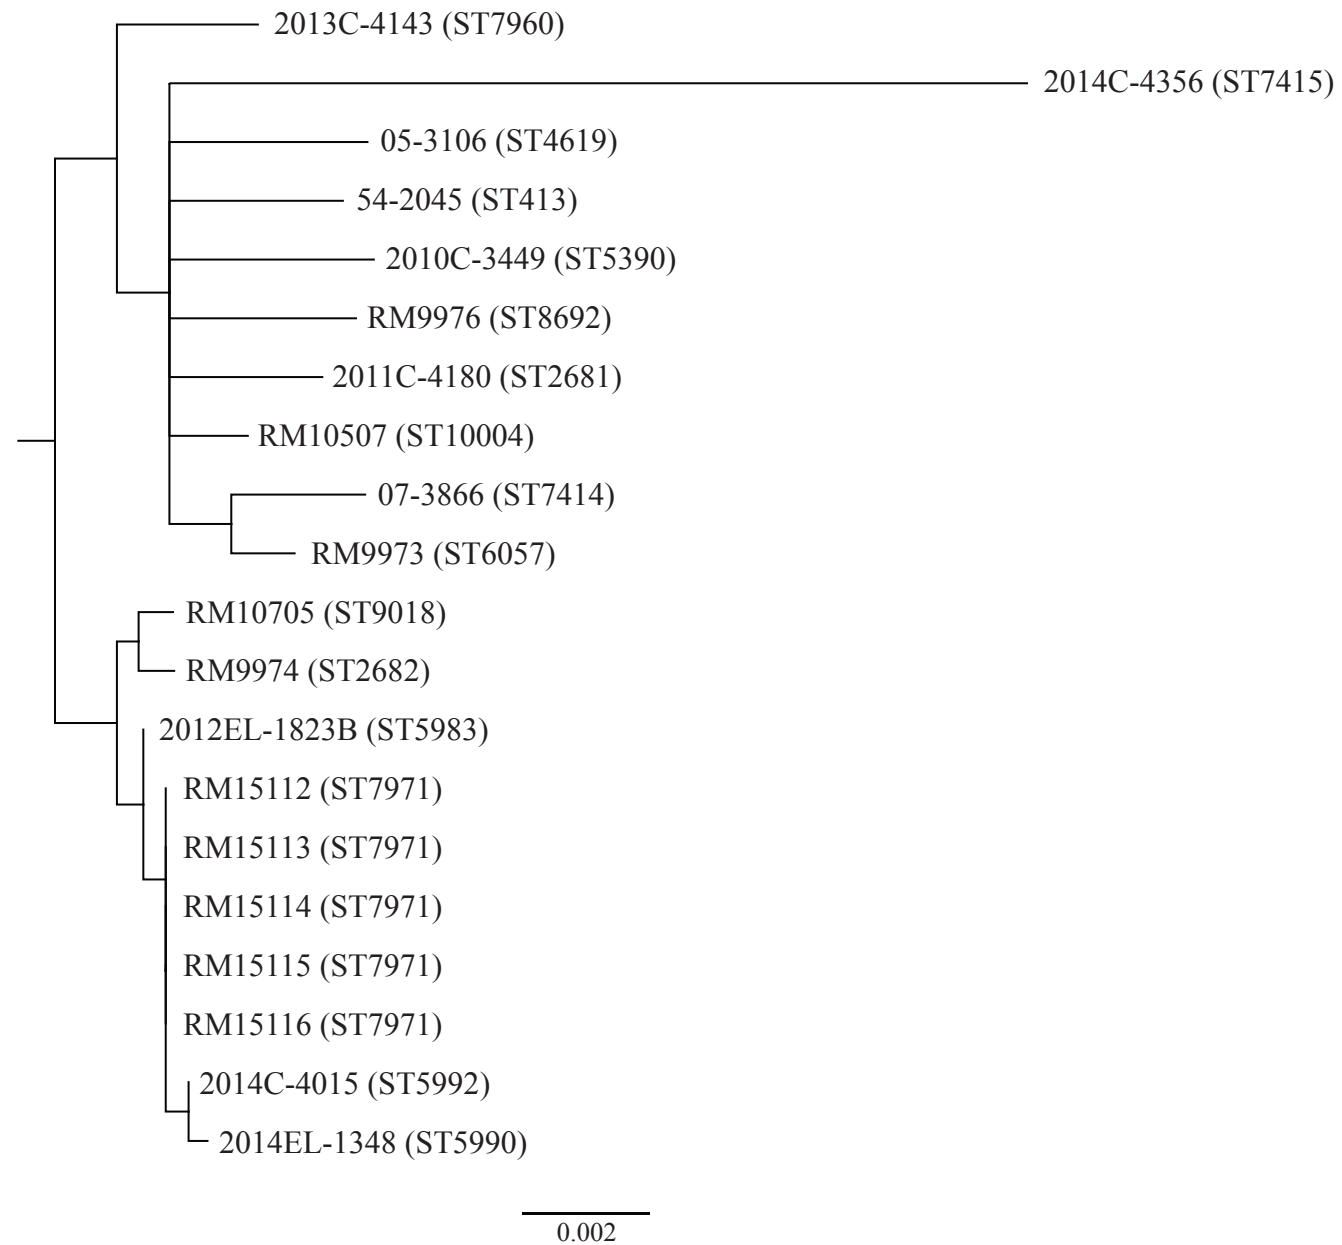

**Figure S1.** Phylogeny of *E. albertii* strains based on sequences of the MLST loci. The concatenated sequences of the seven loci (*adk*, *fumC*, *gyrB*, *icd*, *mdh*, *purA*, and *recA*) were aligned using Clustal Omega and the consensus sequence was used to construct phylogeny tree in Geneious Prime® as detailed in Materials and Methods. The sequence type (ST) was determined using MLST 2.0 service at the Center for Genomic Epidemiology with the *Escherichia coli* #1 configuration.

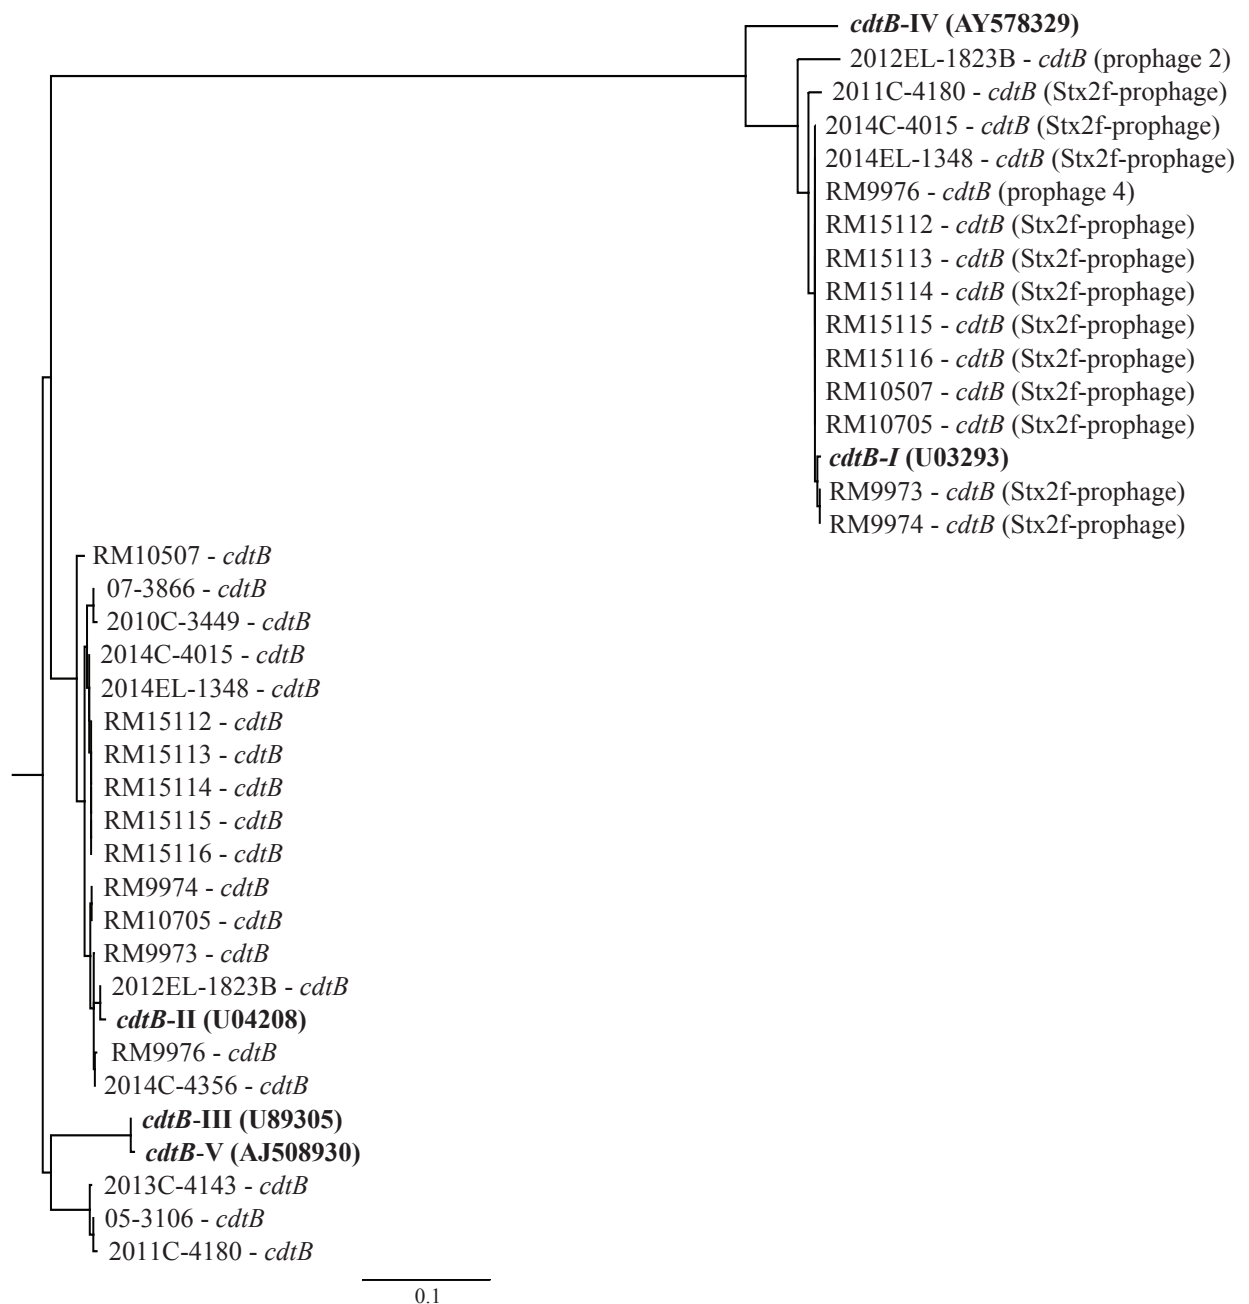

**Figure S2. Phylogeny of *E. albertii* *cdtB*.** Boldface indicates reference genes for five subtypes. The GenBank accession numbers are shown in parentheses. The *cdtB* gene located on the Stx2f-prophage in strain 2012EL-1823 was not included in the analyses due to an large insertional mutation in the *cdtB* gene (Loucs tag, AYN53\_RS14910).
